# Supplementary figures and images for: Curcumol Inhibits the Development of Prostate Cancer by miR-125a/STAT3 Axis
Source: Hindawi journal article supplement (doi:10.1155/2022/9317402), 2022-07-30

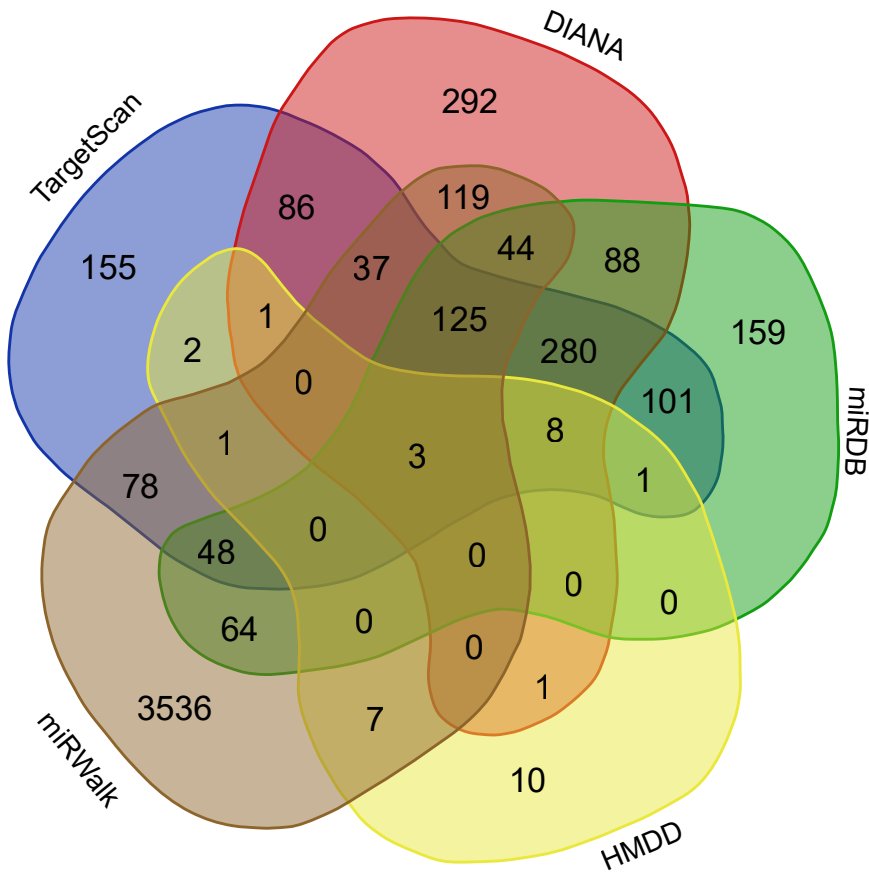

Supplement: f1 [file 9317402.f1.zip]

A

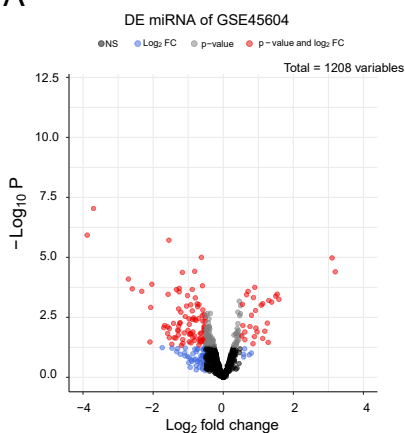

B

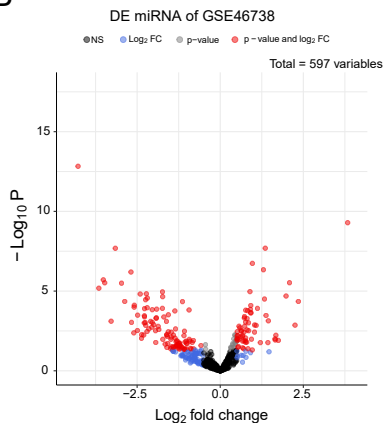

C

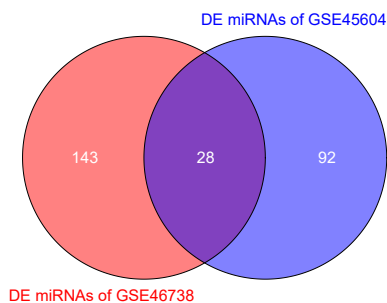

D

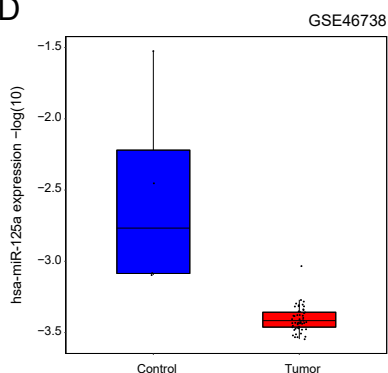

E

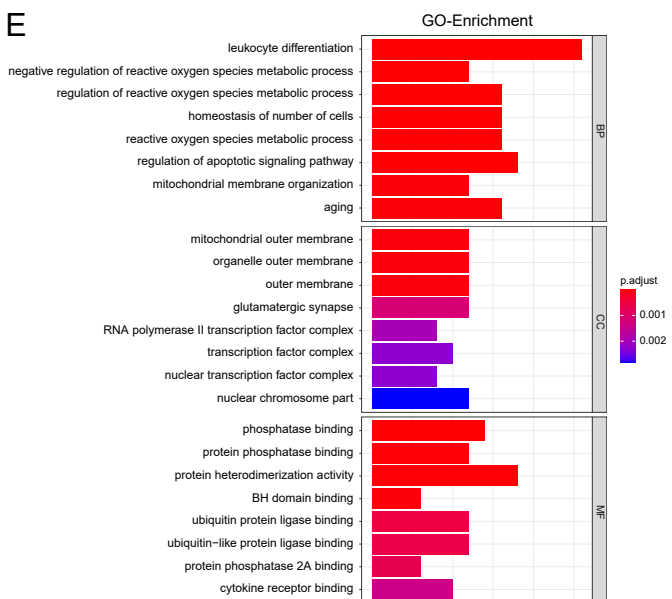

F

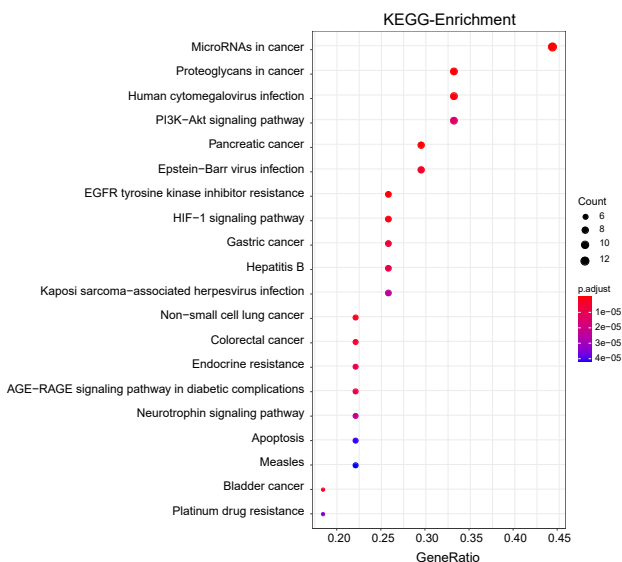

Supplement: f1 [file 9317402.f1.zip]
